# Supplementary material for: The Distribution of Cytotoxic Necrotizing Factors (CNF-1, CNF-2, CNF-3) and Cytolethal Distending Toxins (CDT-1, CDT-2, CDT-3, CDT-4) in Escherichia coli Strains Isolated from Extraintestinal Infections and The Determination of Their Philogenetic Relationship by PFGE
Source: Research Square preprint supplement (doi:10.21203/rs.3.rs-120529/v1), 2020-12-08
Supplement: Supplementary file 1 [file 85d78fe3f9a6b9455d4ef189.docx]

Dear Editor,

I have added below the original and exposure images of genes as far as I could find.

Best regards.

Figure 1: Agarose gel electrophoresis images of PCR amplification products of uidA (120 bp):No: 1-26 bands positive. DNA marker (100-1000 bp ladder).

Figure 2: Agarose gel electrophoresis images of PCR amplification products of cdt1 and uidA genes. DNA marker (100-1000 bp ladder). cdt1 (411 bp): No: 4,6,8,10 bands positive.

Figure 3: Agarose gel electrophoresis images of PCR amplification products of cdt2 genes. DNA marker (100-1000 bp ladder). cdt2 (556 bp): No:4,5,7 bands positive.

Figure 4: Agarose gel electrophoresis images of PCR amplification products of cdt3 genes. DNA marker (100-1000 bp ladder). cdt3 (555 bp): No: 1, 2,3 bands positive.

Figure 5: Agarose gel electrophoresis images of PCR amplification products of cdt4 genes. DNA marker (50 bp ladder). cdt4 (350 bp): No: 28 band positive.

Figure 6: Agarose gel electrophoresis images of PCR amplification products of cnf1 genes. DNA marker (100-3000 bp ladder). cnf1 (1111 bp): No: 1, 3, 4, 12, 14, 16, 18, 19 bands positive.

Figure 7: Agarose gel electrophoresis images of PCR amplification products of cnf1 genes. DNA marker (100-3000 bp ladder). cnf1 (1111 bp): No: 8, 17 bands positive.

Figure 8: Agarose gel electrophoresis images of PCR amplification products of cnf1 genes. DNA marker (100-3000 bp ladder). cnf1 (1111 bp): No: 5, 6, 11 bands positive.

Figure 9: Agarose gel electrophoresis images of PCR amplification products of cnf2 genes. DNA marker (100-3000 bp ladder). cnf2 (1240 bp): No: 12, 14-18 bands positive.

Figure 10: Agarose gel electrophoresis images of PCR amplification products of cnf2 genes. DNA marker (100-3000 bp ladder). cnf2 (1240 bp): No: 11,12,13 bands positive.

Figure 11: Agarose gel electrophoresis images of PCR amplification products of cnf2 genes. DNA marker (100-1000 bp ladder). cnf2 (1240 bp): No: 2 band positive.

Figure 12: Agarose gel electrophoresis images of PCR amplification products of cnf2 genes. DNA marker (100-1000 bp ladder). cnf2 (1240 bp): No: 1band positive.

Figure 13: Agarose gel electrophoresis images of PCR amplification products of cnf3 genes. DNA marker (100-3000 bp ladder). cnf3 (757 bp): No: 17 band positive.

Figure 14: Agarose gel electrophoresis images of PCR amplification products of cnf3 genes. DNA marker (100-1000 bp ladder). cnf3 (757 bp): No: 30 band positive.

Figure 15: Agarose gel electrophoresis images of PCR amplification products of both toxins-factors genes. DNA marker (100-3000 bp ladder). cnf1 (1111) and cnf2 (1240 bp): No: 12 band positive; cnf1 (1111) and cnf3 (757): No:17 band positive.

Figure 16: PFGE gel images

Figure 17: PFGE gel images

**

**

**26 M**

**1 M**

**M 4 6 8 M 10**

**

**





**4 5 7 M**





**M 1 2 3**

**

**

**28 M**





**M 1 3 4 12 M 14 16 18 19 M**





**M 8 17**





**M 5 6 M 11**





**M 11 12 13**

**M M 12 14 15 16 17 18**








**2 M**





**M 1**





**M M 17**





**30 M**





**M M 12 17**


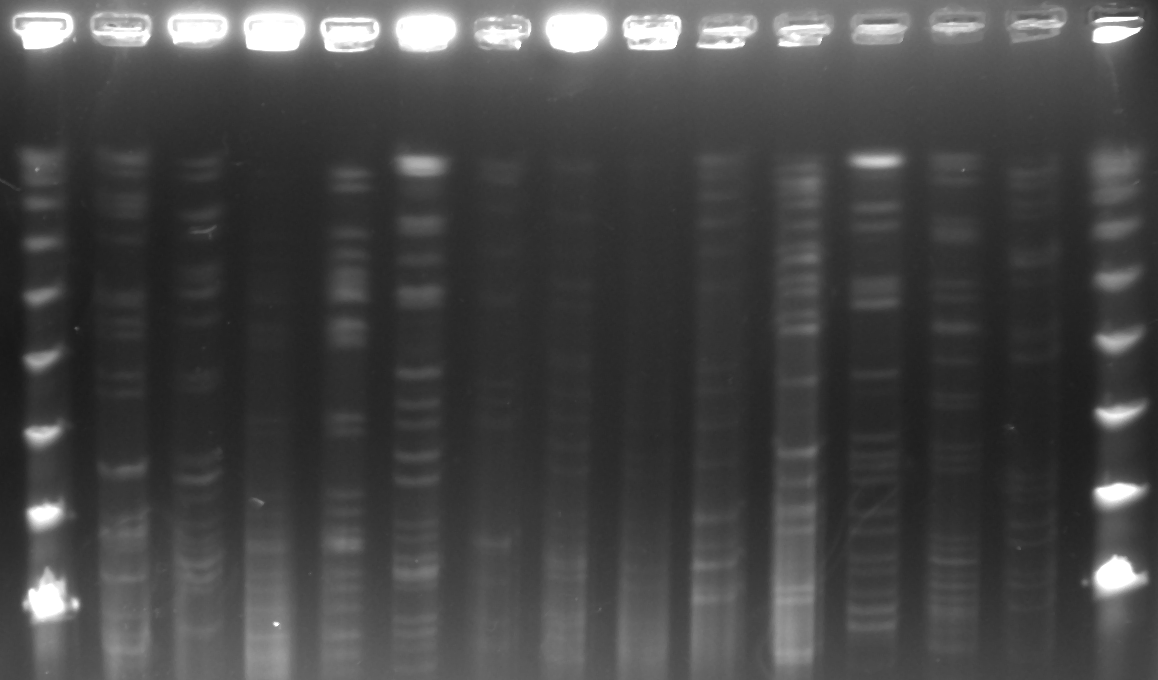


**

**
